# Supplementary material for: Fibroblast-specific deletion of IL-1 receptor-1 reduces adverse cardiac remodeling following myocardial infarction
Source: PubMed Central journal article supplement (PMC6777910; doi:10.1172/jci.insight.125074), 2019-09-05
Supplement: jciinsight-4-125074-s128.pdf [file jciinsight-4-125074-s128.pdf]

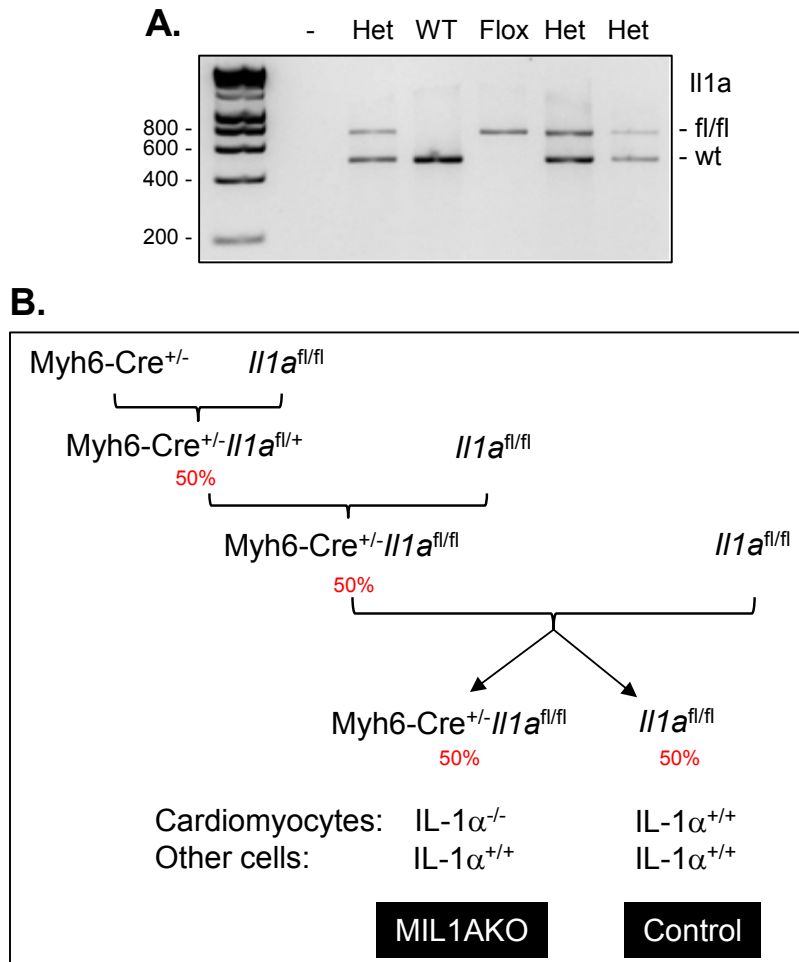

**Supplemental Figure 1. Genotyping and breeding strategy for generating the cardiomyocyte-specific IL-1 $\alpha$  knockout mouse line (MIL1AKO).** (A) A floxed mouse line (*Il1a*<sup>fl/fl</sup>) was generated in which exon 4 of the *Il1a* gene was flanked by loxP sites. Genotyping PCR showing amplification of wild-type and *Il1a*<sup>fl/fl</sup> alleles in wild-type (WT; +/+; 485 bp), heterozygous (Het; +/-) and floxed (fl/fl; 692 bp) mice. Size markers (bp) are to the left. See Supplemental Table 3 for primer details. (B) Breeding strategy for generating *Myh6-Cre-Il1a*<sup>fl/fl</sup> (MIL1AKO) line. Floxed *Il1a* mice (*Il1a*<sup>fl/fl</sup>) were bred with heterozygous mice expressing Cre recombinase under control of the cardiomyocyte-specific *Myh6* promoter (*Myh6-Cre*<sup>+/-</sup>) to produce Cre-positive cardiac myocyte-specific IL-1 $\alpha$  KO (MIL1AKO) mice and control Cre-negative floxed littermates. Percentages indicate predicted proportion of correct genotype.

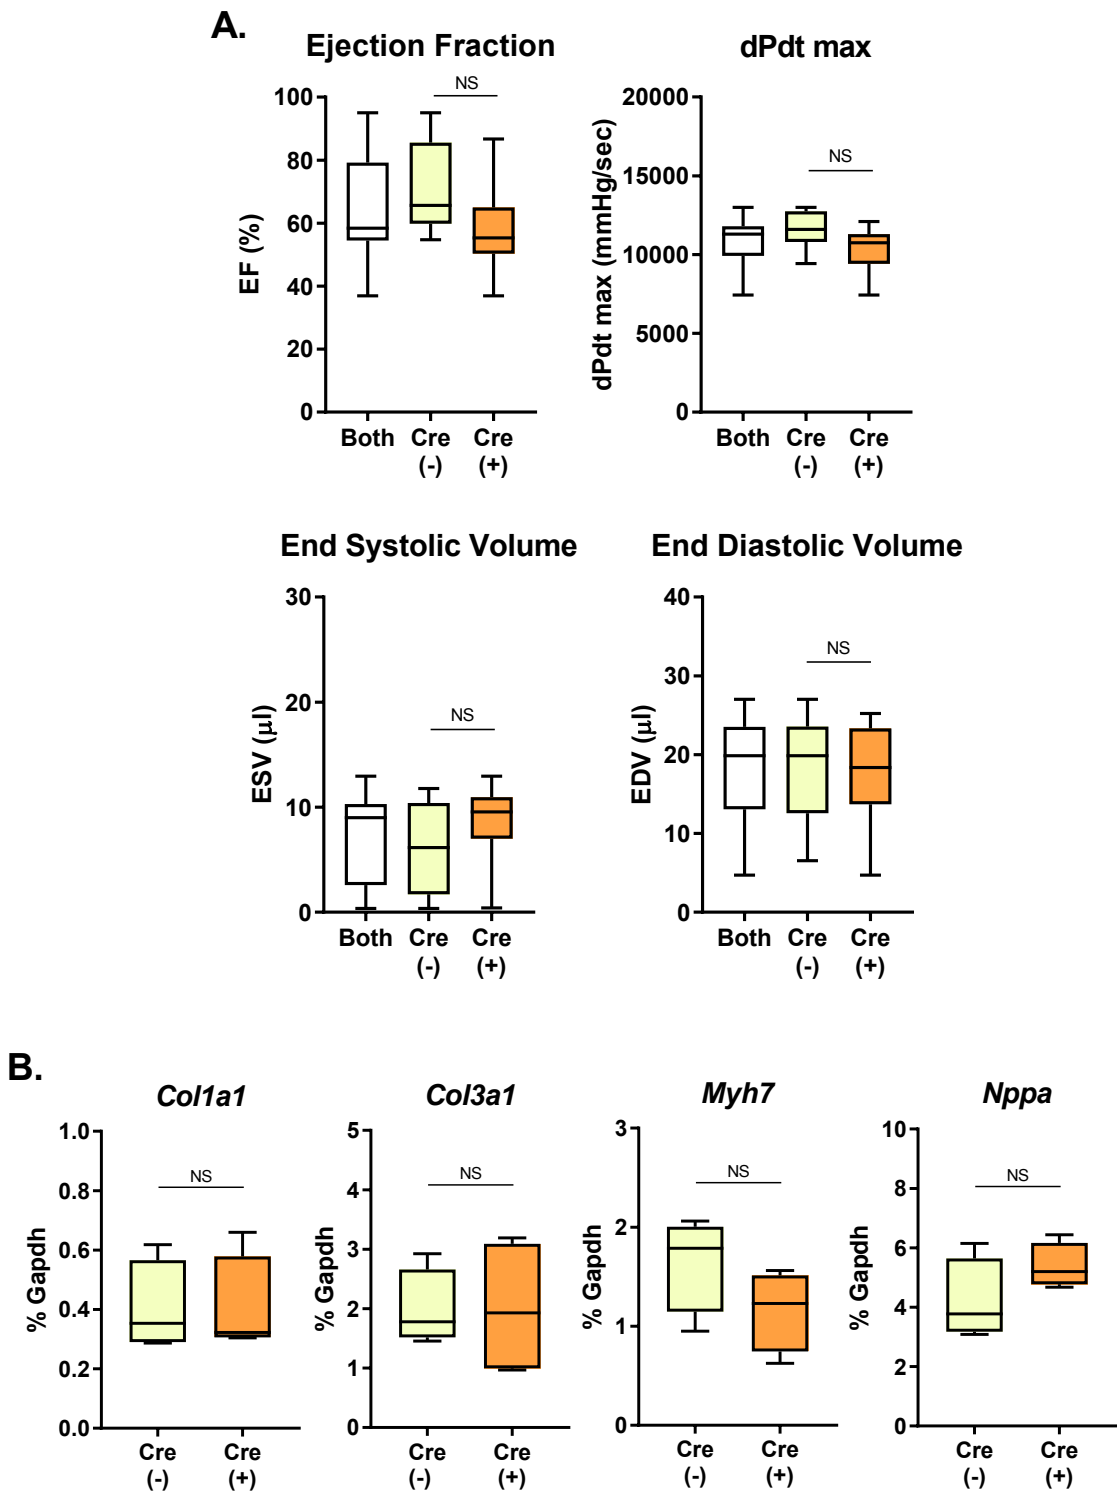

**Supplemental Figure 2. Comparison of baseline cardiac characteristics and gene expression in myocyte-specific Cre lines.** (A) Cardiac parameters assessed by Millar pressure-volume conductance catheter in sham operated animals. Cre(-) = Cre-negative *Il1a*<sup>f/f</sup> (n=9); Cre(+) = *Myh6*-Cre-positive *Il1a*<sup>f/f</sup> (n=10); Both = combined (n=19), as shown in Figure 1E. Box plots illustrate median, 25th/75th percentiles and minimum/maximum. NS = not significantly different between Cre(-) and Cre(+) (2-tailed unpaired t-test). (B) qRT-PCR data showing relative mRNA levels of remodeling genes collagen I $\alpha$ 1 (*Col1a1*), collagen III $\alpha$ 1 (*Col3a1*),  $\beta$ -myosin heavy chain (*Myh7*) and atrial natriuretic factor (*Nppa*) in hearts from sham operated animals. Cre(-) = Cre-negative *Il1a*<sup>f/f</sup> (n=4); Cre(+) = *Myh6*-Cre-positive *Il1a*<sup>f/f</sup> (n=4). NS = not significantly different (2-tailed unpaired t-test).

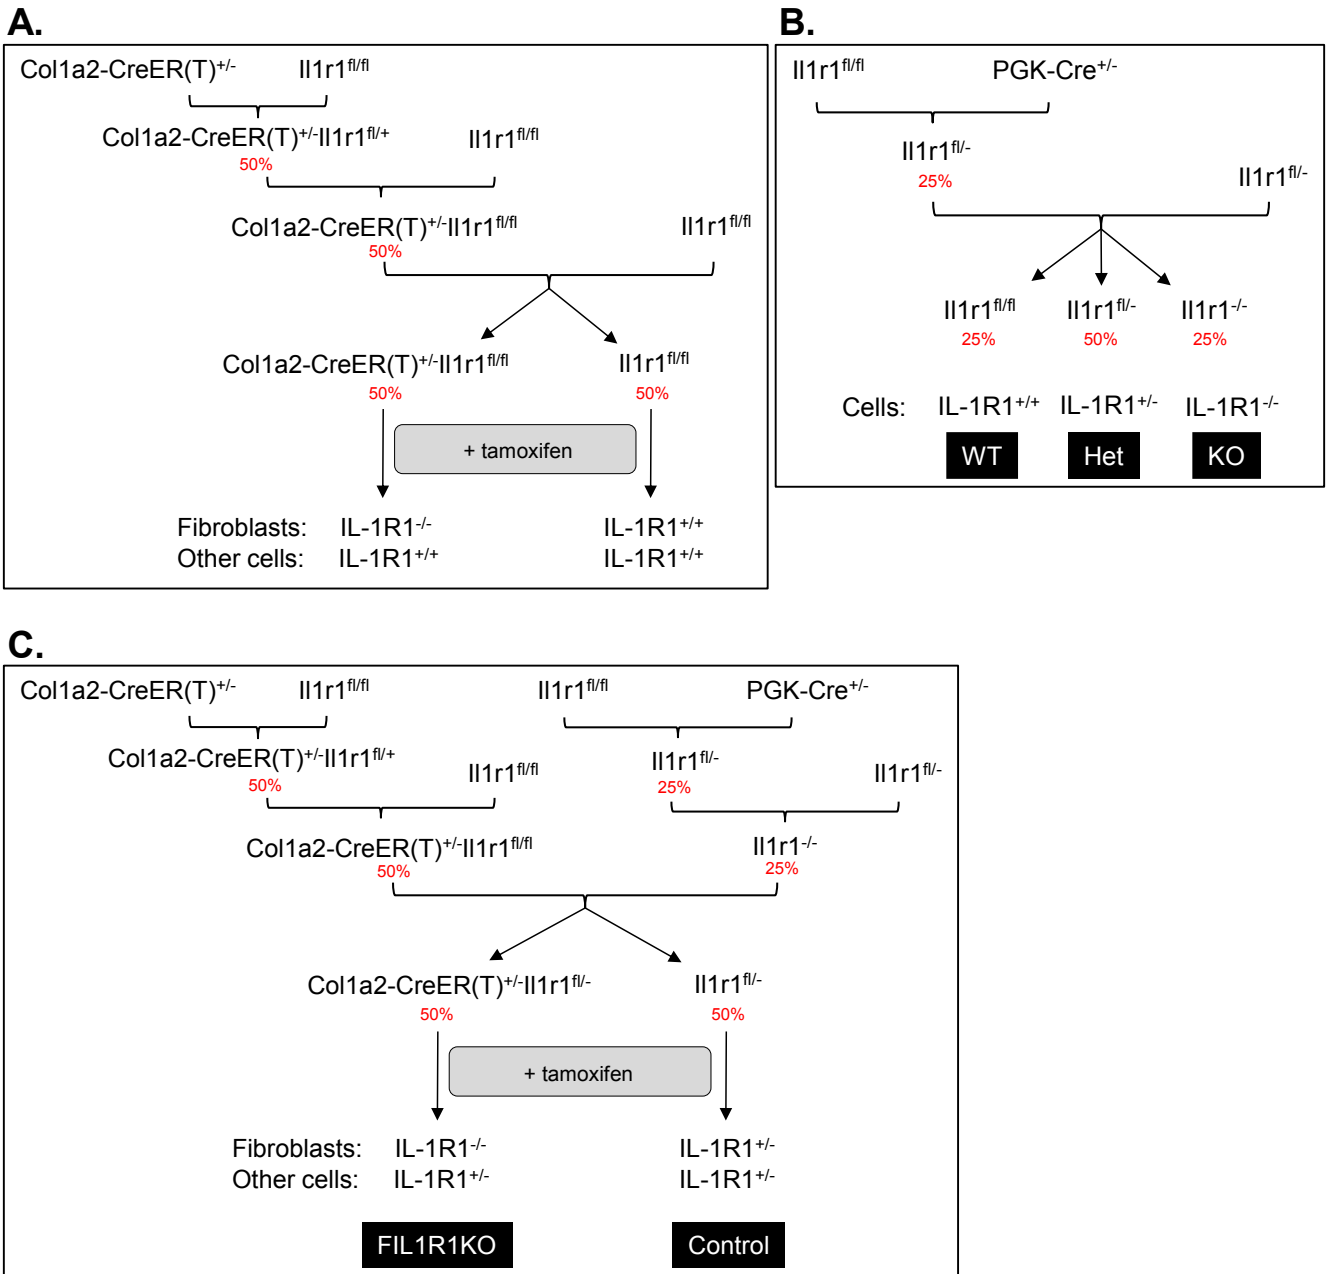

**Supplemental Figure 3. Breeding strategies for generating fibroblast-targeted mouse lines.** (A) Generation of *Colla2*-CreER(T)-*Il1r1*<sup>fl/fl</sup> line. Floxed *Il1r1* mice (*Il1r1*<sup>fl/fl</sup>) were bred with heterozygous mice expressing tamoxifen-inducible Cre recombinase under control of the fibroblast-specific *Colla2* promoter (*Colla2*-CreER(T)<sup>+/-</sup>). After tamoxifen treatment, this resulted in Cre-positive fibroblast-specific IL-1R1 KO mice and control Cre-negative *Il1r1* floxed littermates. (B) Generation of IL-1R1<sup>+/-</sup> and IL-1R1<sup>-/-</sup> lines. Male floxed *Il1r1* mice were bred with female PGK-Cre global deleter mice to produce *Il1r1*<sup>fl/-</sup> mice. These were back crossed with other *Il1r1*<sup>fl/-</sup> mice to generate a combination of *Il1r1*<sup>+/+</sup> (WT), *Il1r1*<sup>fl/-</sup> (Het) and *Il1r1*<sup>-/-</sup> (KO). (C) Generation of FIL1R1KO line. *Colla2*-CreER(T)<sup>+/-</sup>*Il1r1*<sup>fl/fl</sup> mice were crossed with *Il1r1*<sup>-/-</sup> mice to generate the Cre-positive *Colla2*-CreER(T)-*Il1r1*<sup>fl/-</sup> line. After tamoxifen treatment, this resulted in a fibroblast-specific IL1R1 KO (FIL1R1KO). Control animals were Cre-negative hemizygous floxed (*Il1r1*<sup>fl/-</sup>) littermates. Percentages indicate predicted proportion of correct genotype.

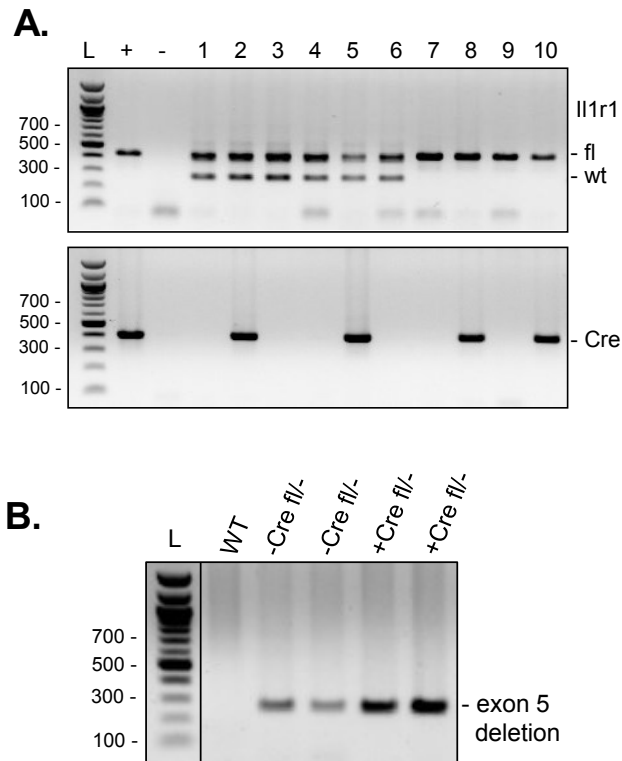

**Supplemental Figure 4. Genetic characterization of tamoxifen-inducible fibroblast-specific IL-1R1 knockout mice.** (A) Genotyping of *Il1r1*<sup>fl/fl</sup> lines. L = 100 bp ladder; +/- = positive/negative control. Upper panel: *Il1r1* fl primers; floxed (fl; 432 bp), wild-type (wt; 267 bp). Lower panel: Cre primers (408 bp). (B) Genotyping for exon 5 deletion (280 bp) in *Il1r1*<sup>fl/-</sup> lines after tamoxifen injection. Vertical dividing line indicates that the samples were run on the same gel but were non-contiguous. See Supplemental Table 3 for primer details.

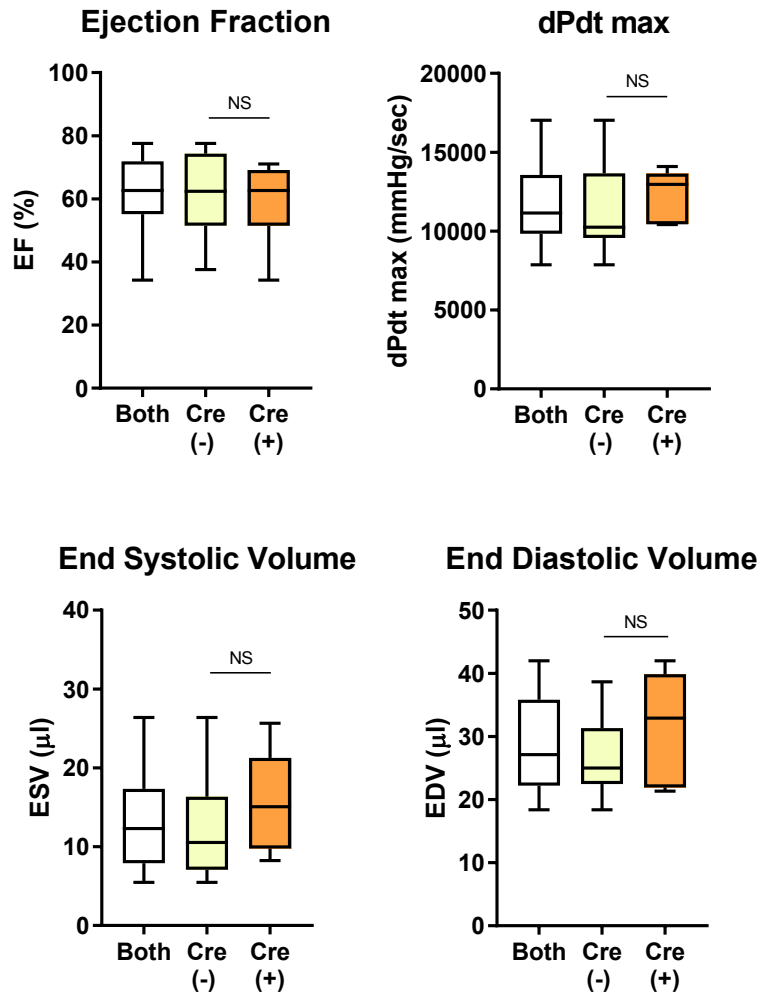

**Supplemental Figure 5. Comparison of baseline cardiac characteristics of Cre-negative and Cre-positive IL-1R1 floxed mice.** Cardiac parameters were assessed by Millar pressure-volume conductance catheter in sham operated animals. Cre(-) = Cre-negative *Il1r1<sup>fl/-</sup>* (n=12); Cre(+) = *Colla2*-Cre-positive *Il1r1<sup>fl/-</sup>* (n=6); Both = combined (n=18), as shown in Figure 5B. Neither group was injected with tamoxifen. Box plots illustrate median, 25th/75th percentiles and minimum/maximum. NS = not significantly different between Cre(-) and Cre(+) (2-tailed unpaired t-test).

| Parameter                      | Sham<br>(n=19) | MI Ctrl<br>(n=19) | MI MIL1AKO<br>(n=17) |
|--------------------------------|----------------|-------------------|----------------------|
| Ejection fraction (%)          | 64.57 ± 3.65   | 40.76 ± 3.31***   | 42.86 ± 9.85***      |
| End systolic volume (μl)       | 7.35 ± 1.02    | 18.18 ± 1.49***   | 16.13 ± 1.64***      |
| End diastolic volume (μl)      | 17.82 ± 1.50   | 29.31 ± 1.26***   | 26.78 ± 1.96***      |
| Cardiac output (μl/min)        | 6195 ± 402     | 6352 ± 491        | 5893 ± 450           |
| Stroke volume (μl)             | 11.52 ± 0.78   | 11.58 ± 0.89      | 11.32 ± 0.89         |
| Heart rate (bpm)               | 541.6 ± 9.2    | 555.6 ± 14.8      | 524.6 ± 12.7         |
| End systolic pressure (mmHg)   | 94.92 ± 2.59   | 104.4 ± 1.76**    | 99.41 ± 1.85         |
| End diastolic pressure (mmHg)  | 4.42 ± 0.94    | 8.09 ± 1.22       | 6.55 ± 1.19          |
| dPdt <sub>max</sub> (mmHg/sec) | 10911 ± 340    | 10200 ± 503       | 8952 ± 272**         |
| dPdt <sub>min</sub> (mmHg/sec) | -10474 ± 391   | -9768 ± 586       | -8607 ± 313*         |
| Arterial blood pressure (mmHg) | 70.7 ± 1.6     | 74.7 ± 1.9        | 73.3 ± 1.8           |

**Supplemental Table 1. Effect of cardiomyocyte-specific IL-1α deletion on cardiac function 4 weeks after myocardial infarction.** Cardiac parameters were assessed by Millar pressure-volume conductance catheter. Sham = mixed genotypes (n=19); MI Ctrl = Cre-negative *Il1a<sup>fl/fl</sup>* after MI (n=19); MI MIL1AKO = *Myh6*-Cre-positive *Il1a<sup>fl/fl</sup>* after MI (n=17). Data are mean values ± SEM. \*\*\*P<0.001, \*\*P<0.01, \*P<0.05 versus sham control (1-way ANOVA with Tukey post hoc). All other comparisons not significant. Note that ejection fraction, end systolic volume, end diastolic volume and dPdt<sub>max</sub> data are also depicted in Figure 1E.

| Parameter                      | Sham<br>(n=18) | MI Ctrl<br>(n=11) | MI FIL1R1KO<br>(n=11) |
|--------------------------------|----------------|-------------------|-----------------------|
| Ejection fraction (%)          | 61.24 ± 2.93   | 47.84 ± 3.47*     | 56.03 ± 3.68          |
| End systolic volume (μl)       | 13.36 ± 1.50   | 18.83 ± 2.03      | 14.53 ± 2.46          |
| End diastolic volume (μl)      | 28.54 ± 1.76   | 31.68 ± 2.49      | 27.15 ± 2.77          |
| Cardiac output (μl/min)        | 10195 ± 576    | 8562 ± 1052       | 7742 ± 553            |
| Stroke volume (μl)             | 17.68 ± 0.97   | 15.41 ± 1.59      | 14.46 ± 0.98          |
| Heart rate (bpm)               | 579.9 ± 16.5   | 550.3 ± 18.4      | 536.3 ± 17.6          |
| End systolic pressure (mmHg)   | 104.40 ± 2.92  | 91.45 ± 3.46*     | 93.36 ± 2.38*         |
| End diastolic pressure (mmHg)  | 9.88 ± 1.25    | 9.68 ± 2.17       | 10.81 ± 1.17          |
| dPdt <sub>max</sub> (mmHg/sec) | 11805 ± 574    | 9350 ± 747*       | 9828 ± 391            |
| dPdt <sub>min</sub> (mmHg/sec) | -11091 ± 561   | -9386 ± 944       | -9251 ± 563           |
| Arterial blood pressure (mmHg) | 71.6 ± 2.4     | 67.6 ± 2.1        | 67.4 ± 1.5            |

**Supplemental Table 2. Effect of fibroblast-specific IL-1R1 deletion on cardiac function 4 weeks after myocardial infarction.** Sham = mixed genotypes, no tamoxifen treatment (n=18); MI Ctrl = tamoxifen-treated Cre-negative *Il1r1<sup>fl/-</sup>* after MI (n=11); MI FIL1R1KO = tamoxifen-treated *Colla2*-Cre-positive *Il1r1<sup>fl/-</sup>* after MI (n=11). Data are mean values ± SEM. \*P<0.05 versus sham control (1-way ANOVA with Tukey post hoc). All other comparisons not significant. Note that ejection fraction, end systolic volume, end diastolic volume and dPdt<sub>max</sub> data are also depicted in Figure 5B.

| <b>Primer target</b>                                     | <b>Primer sequence</b>                                                        | <b>Product size (bp)</b>        |
|----------------------------------------------------------|-------------------------------------------------------------------------------|---------------------------------|
| Cre (forward)<br>Cre (reverse)                           | 5' GCATTACCGGTTCGATGCAACGAGTGATGAG 3'<br>5' GAGTGAACGAACCTGGTCGAAATCAGTGCG 3' | 408 (Cre)                       |
| <i>Il1a</i> fl (forward)<br><i>Il1a</i> fl (reverse)     | 5' TTGTCCTCCCTAGCCAGTTG 3'<br>5' ATTTGGCCCTCTGTTTTGCC 3'                      | 692 (floxed)<br>485 (wild type) |
| <i>Il1a</i> del (forward)<br><i>Il1a</i> del (reverse)   | 5' TTGTCCTCCCTAGCCAGTTG 3'<br>5' TCCAGTGCTGAAAAGTGTGC 3'                      | 456 (deletion)                  |
| <i>Il1r1</i> fl (forward)<br><i>Il1r1</i> fl (reverse)   | 5' CTAGTCTGGTGGAACTTACATGC 3'<br>5' AACTGAAAGCTCAGTTGTATACAGC 3'              | 432 (floxed)<br>267 (wild type) |
| <i>Il1r1</i> del (forward)<br><i>Il1r1</i> del (reverse) | 5' CTAGTCTGGTGGAACTTACATGC 3'<br>5' GATAAAGCAGAGCTGGAGACAGG 3'                | 280 (deletion)                  |

**Supplemental Table 3. Genotyping of transgenic mice.** Properties of PCR primers used for genotyping and predicted product sizes. bp=base pairs.



Areas shown  
in final figure

Full unedited gel for Figure 1B (upper panel):

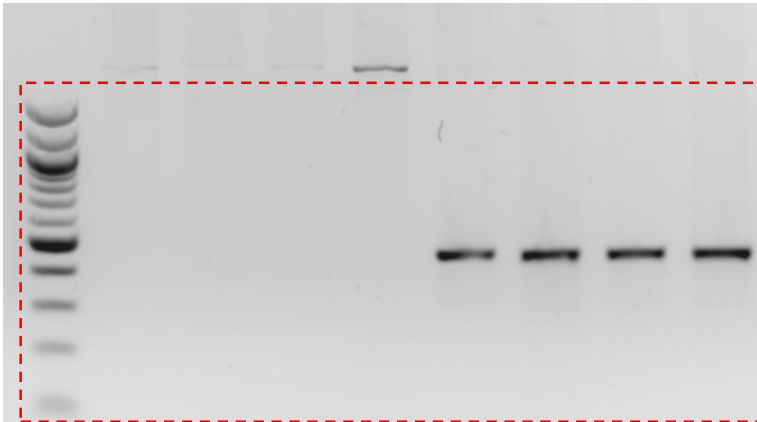

Full unedited gel for Figure 1B (lower panel):

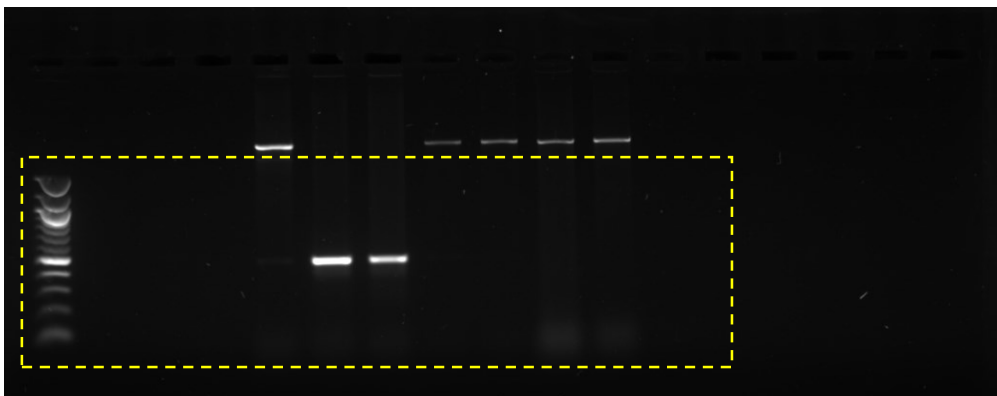

Black/white inverted for consistency

# Full unedited gels for Figure 3B:

Areas shown  
in final figure

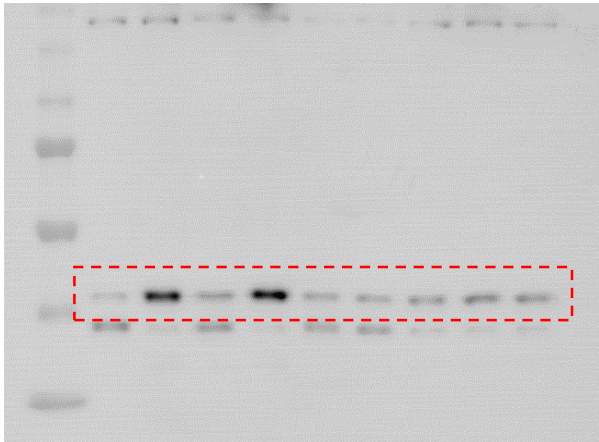

Lower bands are from previous probing with different primary antibody (I $\kappa$ B expression - image below)

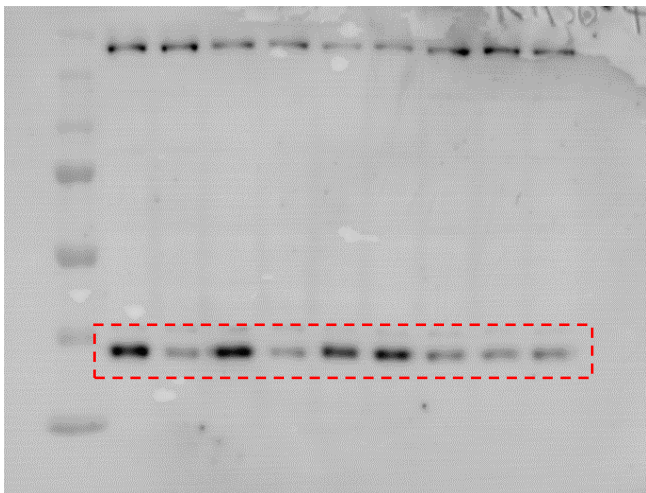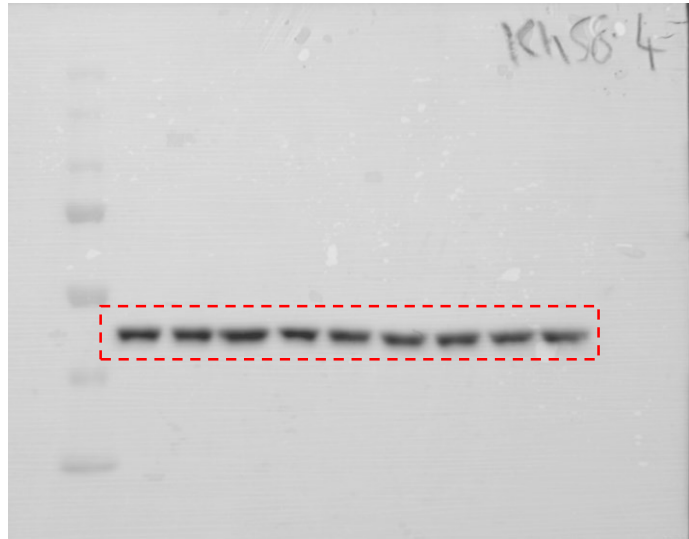

Full unedited gels for Figure 4C:

Areas shown  
in final figure

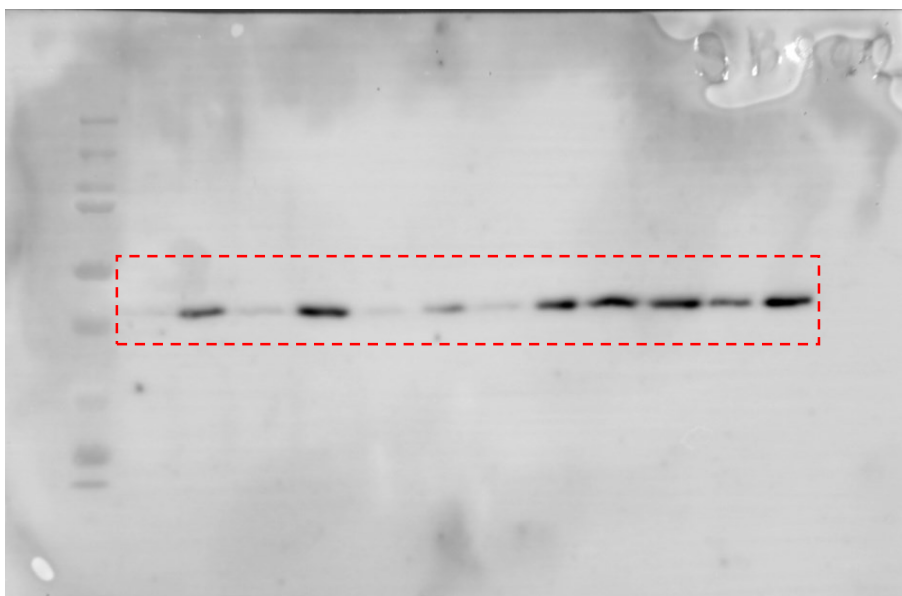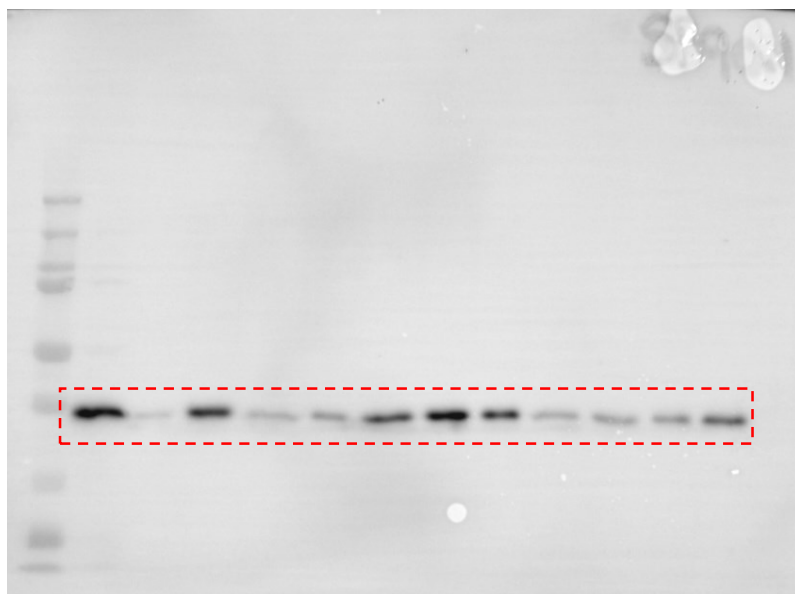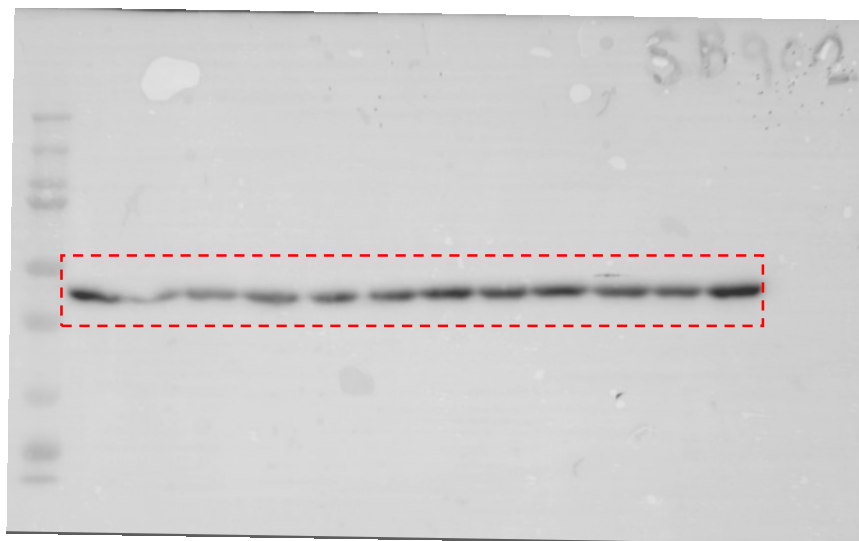

Areas shown  
in final figure

Full unedited gel for Supplemental Figure 1A:

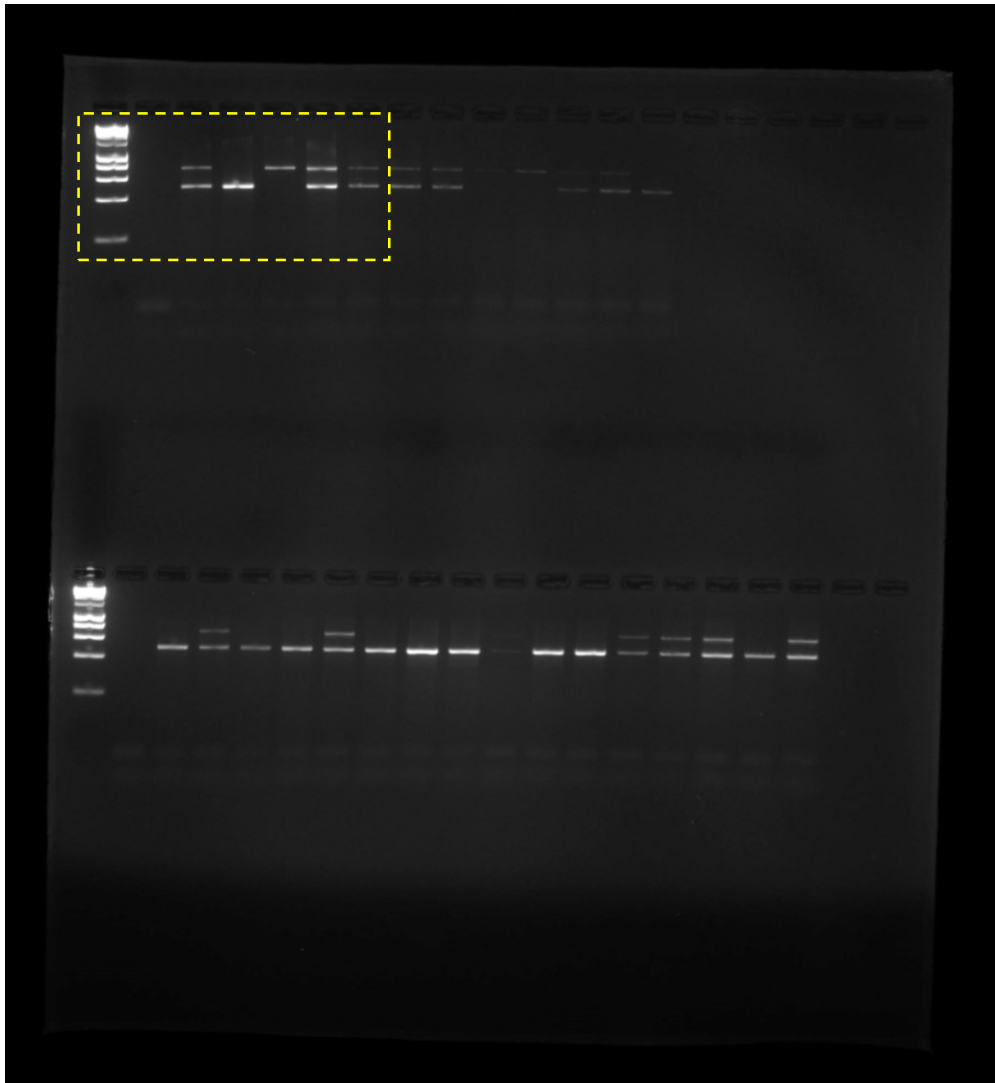

Black/white inverted for consistency

Areas shown  
in final figure

Full unedited gels for Supplemental Figure 4A:

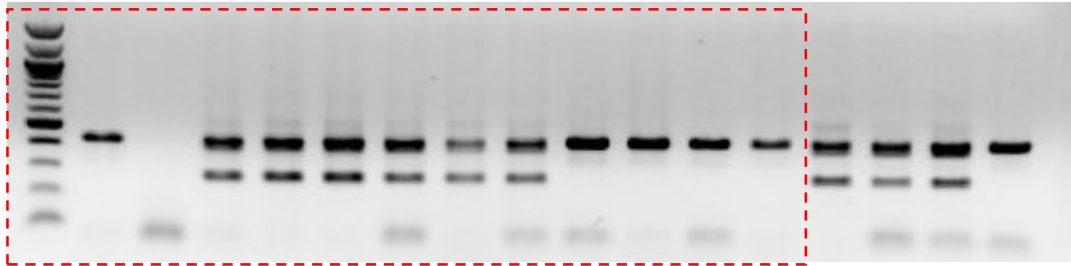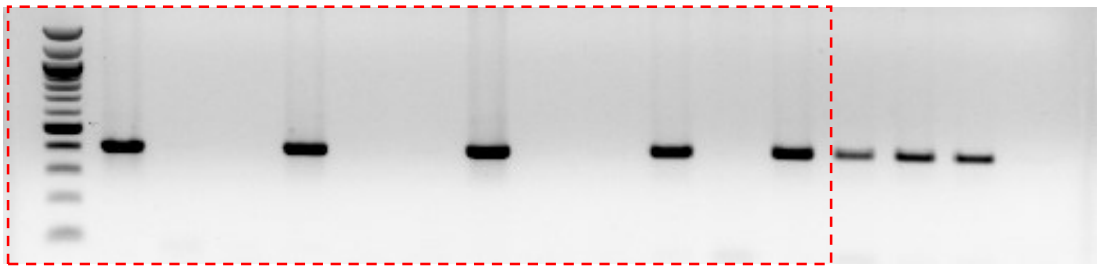

Full unedited gel for Supplemental Figure 4B:

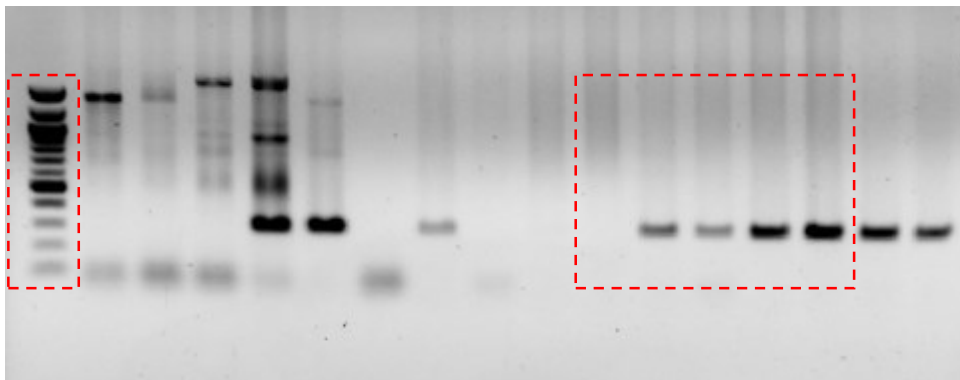

Size ladder moved adjacent to samples for convenience
